# Supplementary material for: Multifunctional magnetically removable nanogated lids of Fe3O4–capped mesoporous silica nanoparticles for intracellular controlled release and MR imaging
Source: Royal Society of Chemistry journal article supplement (doi:10.1039/c0jm02590a), 2011-01-01
Supplement: c0jm02590a.pdf [file c0jm02590a.pdf]

## Supplementary information

### Multifunctional Magnetically Removable Nanogated Lids of Fe<sub>3</sub>O<sub>4</sub>-Capped Mesoporous Silica Nanoparticles for Intracellular Controlled Release and MR Imaging

Po-Jung Chen, Shang-Hsiu Hu, Chi-Sheng Hsiao, You-Yin Chen, Dean-Mo Liu\* and San-Yuan Chen\*

**Table S1.** The Brunauer-Emmett-Teller (BET) analysis of MSN, CPT-loaded MSN and MSN@Fe<sub>3</sub>O<sub>4</sub> nanocarriers.

| Sample                             | Surface area (m <sup>2</sup> /g) | Pore volume (cc/g) | Pore radius (nm) |
|------------------------------------|----------------------------------|--------------------|------------------|
| MSN                                | 1150.97                          | 0.84               | 2.17             |
| CPT-loaded MSN                     | 885.86                           | 0.64               | 1.57             |
| MSN@Fe <sub>3</sub> O <sub>4</sub> | 128.96                           | 0.37               | x                |

Both 667cm<sup>-1</sup> and 542cm<sup>-1</sup> bands are characteristics of Fe<sub>3</sub>O<sub>4</sub> (magnetite), which is attributed to the vibration modes consisting of stretching of oxygen atom along Fe-O bonds. We also used the XPS spectrum to confirm the magnetite. Binding energy of Fe 2p<sub>3/2</sub> is 711.3eV and 2p<sub>1/2</sub> is 724.8eV which correspond to the XPS spectrum of Fe<sub>3</sub>O<sub>4</sub>. From these results, it can be confirmed that the iron oxide on the surface of mesoporous silica nanoparticles should belong to magnetite phase.

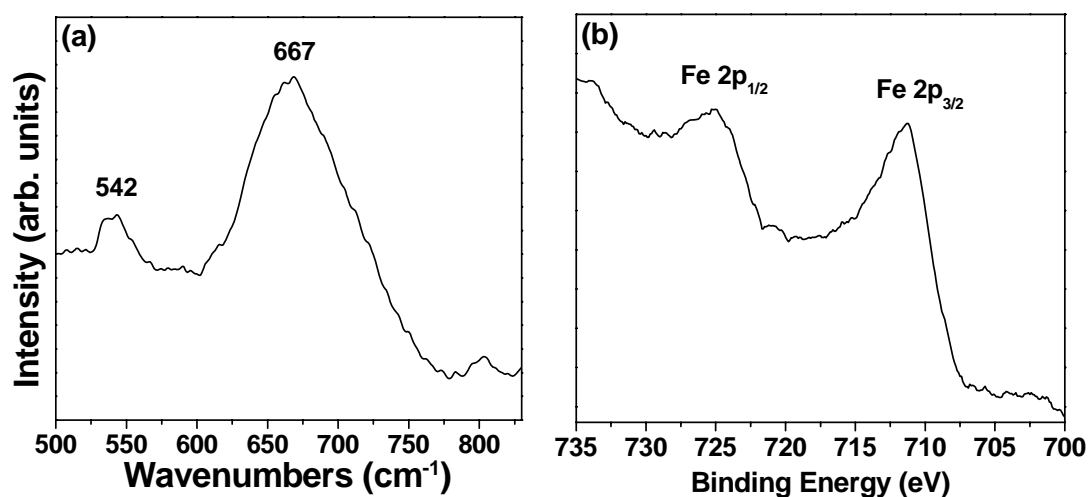

**Figure S1.** (a) The Raman spectroscopy analysis and (b) X-ray Photoelectron Spectrometer of the iron oxide nanoparticles.

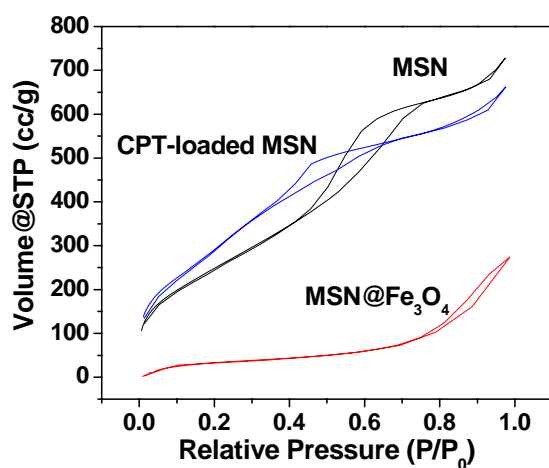

**Figure S2.**  $\text{N}_2$  adsorption/desorption isotherms of MSN, CPT-loaded MSN and MSN@Fe<sub>3</sub>O<sub>4</sub> nanocarriers.
